# Supplementary material for: Karst Ecosystems of Middle Timan, Russia: Soils, Plant Communities, and Soil Oribatid Mites
Source: MDPI journal article supplement (doi:10.3390/d14090718), 2022-08-29
Supplement: s1 [file s1]

# Karst ecosystems of Middle Timan: Soils, Plant Communities, and Soil Invertebrates

Elena N. Melekhina <sup>1</sup>, Vladimir A. Kanev <sup>1</sup>, Svetlana V. Deneva <sup>1</sup>

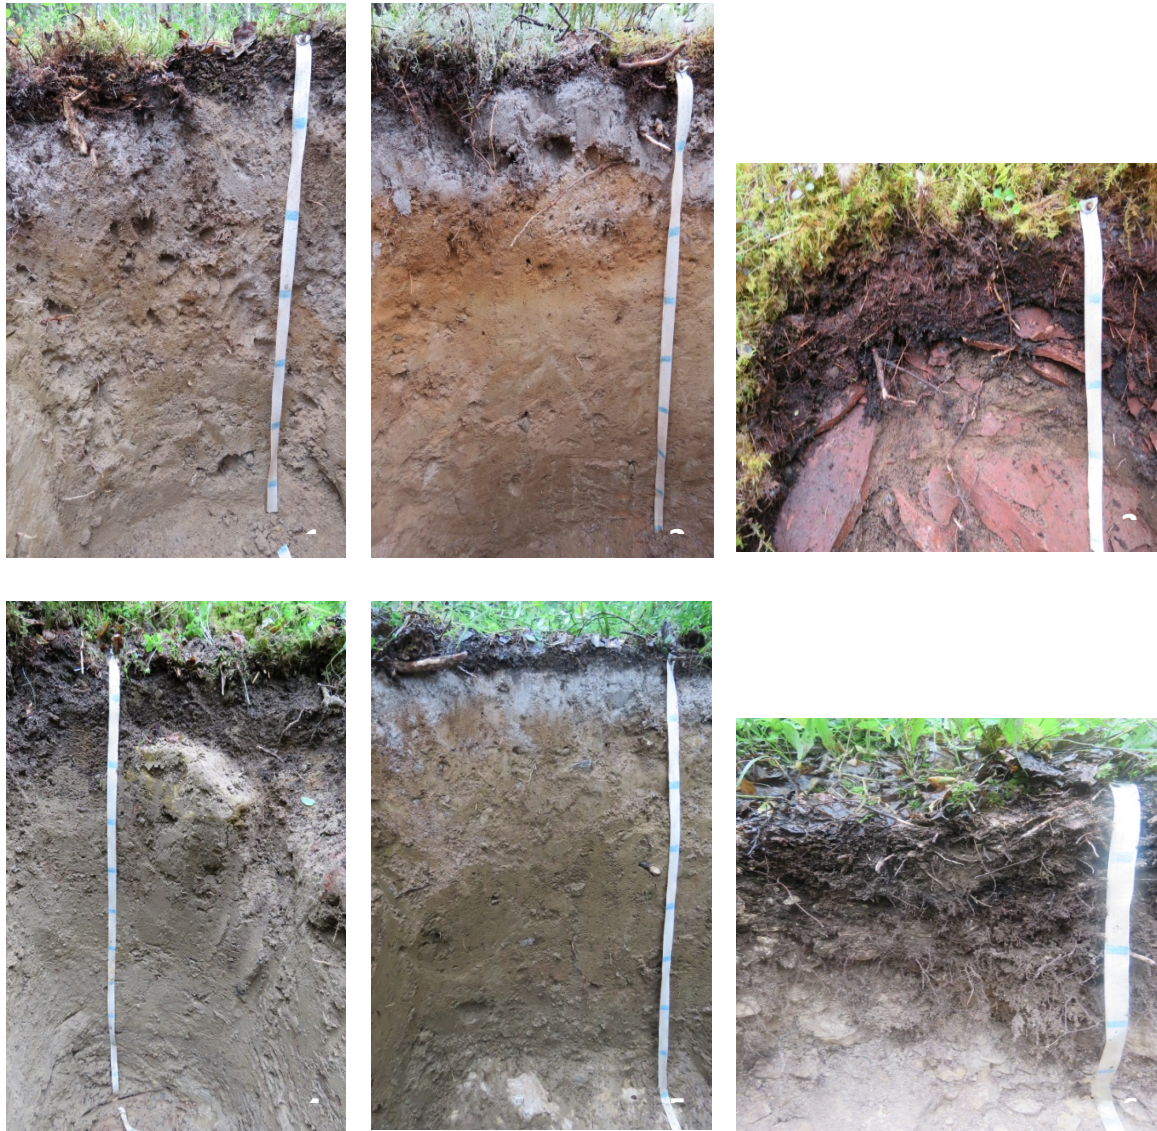

**Figure S1.** Soil profiles of the main observation sites in karst landscapes of the Middle Timan

(Photo by S.V. Deneva).

1 - Site 2. Blueberry-green moss pine forest on a low watershed. Soil - iron-illuvial contact-gley podzol (Stagnic Albic Rustic Podzol (Arenic)).

2 - Site 3. Upper slope of karst crater. Dwarf-lichen-green moss mixed forest. Soil - iron-illuvial podzol (Albic Rustic Podzol (Arenic)).

3 - Site 4. Middle slope of the karst crater. Herbaceous-green moss mixed forest. Soil - mucky-peaty peat-lithozem (Dystric Rendzic Folic Leptosol).

4 - Site 5. Lower slope of a karst crater. Green moss-herbal spruce forest. Soil - gleyic gray-humus stratozem (Pantocolluvic Skeletic Stagnic Regosol (Abruptic, Ochric)).

5 - Site 6. Upper gentle slope in the Ukhta river valley. Dwarf-herbaceous post-fire mixed forest. Soil - gray-humus raw-humus podzolized residual-calcareous (Dystric Calcaric Skeletic Cambisol (Ochric, Nechic)).

6 - Site 7. Lower steep slope in Ukhta river valley. Herbaceous thin mixed forest. Soil - mucky-dark-humus carbolithozem (Calcaric Mollic Folic Leptosol).

|                                                                                                                                                                                                                           |                                                                                                                                                                                                         |
|---------------------------------------------------------------------------------------------------------------------------------------------------------------------------------------------------------------------------|---------------------------------------------------------------------------------------------------------------------------------------------------------------------------------------------------------|
|                                                                                                                                          |                                                                                                                       |
| <p>(1) Site 1. Sedge wetland community in a runoff trough.</p>                                                                                                                                                            | <p>(2) Site 2. Pine shrub-green moss forest.</p>                                                                                                                                                        |
|                                                                                                                                         |                                                                                                                      |
| <p>(3) Site 3. Upper part of the karst crater slope. Mixed herbaceous forest.</p>                                                                                                                                         | <p>(4) Site 3. Grass cover under the canopy of mixed herbaceous forest.<br/>The photo shows *Venus slipperwort (<i>Cypripedium calceolus</i> L.).</p>                                                   |
|                                                                                                                                        |                                                                                                                     |
| <p>(5) Site 4. Middle part of the karst crater slope. Mixed herb-grass-strawberry forest. Grasses include woodruff (<i>Angelica sylvestris</i> L.), common bramble (<i>Rubus saxatilis</i> L.), narrow-leaved willow-</p> | <p>(6) Site 4. Grassland under the canopy of mixed grass-greengrass forest. The photo shows woodruff (<i>Angelica sylvestris</i> L.), common bramble (<i>Rubus saxatilis</i> L.), northern clematis</p> |

|                                                                                                    |                                                                                                                                                                                                  |
|----------------------------------------------------------------------------------------------------|--------------------------------------------------------------------------------------------------------------------------------------------------------------------------------------------------|
| herb ( <i>Epilobium angustifolium</i> L.), and wood geranium ( <i>Geranium sylvaticum</i> L.).     | ( <i>Galium boreale</i> L.), *dremlik dark red ( <i>Epipactis atrorubens</i> ).                                                                                                                  |
|                   |                                                                                                                |
| (7) Site 5. Lower part of the karst sinkhole slope. Spruce green-moss forest.                      | (8) Site 5. Continuous cover of clumps of green mosses: <i>Pleurozium schreberi</i> (Brid.) Mitt. and <i>Ptilium crista-castrensis</i> (Hedw.) De Not. under canopy of spruce green-moss forest. |
|                  |                                                                                                               |
| (9) Site 6. Upper part of the slope in the Ukhta River valley. Mixed shrub-grass-broadleaf forest. | (10) Site 6. Grass-bush layer under the canopy of mixed shrub-grass forest.                                                                                                                      |

|                                                                                                              |                                                                                                                                                                                                                                                                                                                                                                 |
|--------------------------------------------------------------------------------------------------------------|-----------------------------------------------------------------------------------------------------------------------------------------------------------------------------------------------------------------------------------------------------------------------------------------------------------------------------------------------------------------|
|                             |                                                                                                                                                                                                                                                                               |
| <p>(11) Site 7. Lower part of the slope in the Ukhta River valley. Sparse mixed mixed herbaceous forest.</p> | <p>(12) Site 7. Herbaceous-shrub layer of sparse mixed mixed herbaceous forest. In the photo: common sleepy-grass (<i>Pulsatilla patens</i> (L.) Mill.), Sussureaalpina (<i>Saussureaalpina</i>(L.) DC.), common bramble (<i>Rubus saxatilis</i> L.), European meadowsweet (<i>Trollius europaeus</i> L.), and meadow-grass (<i>Lathyrus pratensis</i> L.).</p> |

**Note.** Calciphilic plants are marked with (\*).

**Figure S2.** Vegetation communities surveyed in karst landscapes of the Middle Timan.  
(Photo by V.A. Kanev).
