# Supplementary material for: Karst Ecosystems of Middle Timan, Russia: Soils, Plant Communities, and Soil Oribatid Mites
Source: MDPI journal article supplement (doi:10.3390/d14090718), 2022-08-29
Supplement: s1 [file s1]

Archive with 1 entries (1 files):
- diversity-1747964-supplementary.pdf
